# Supplementary material
Source: publisher site journal article supplement (https://study.sagepub.com/sites/default/files/23%20Bloomberg%203e%20Appendix%20GG.pdf)
Supplement: Supplementary file 1 [file 23%20Bloomberg%203e%20Appendix%20GG.pdf]

# Appendix GG. Sample Table of Contents

---

## Table of Contents

**Abstract**

**Dedication**

**Acknowledgments**

### **CHAPTER I: INTRODUCTION**

Overview of Context  
Problem Statement  
Statement of Purpose and Research Questions  
Research Approach  
Researcher's Perspectives  
Researcher's Assumptions  
Rational of Key Terminology

### **CHAPTER II: LITERATURE REVIEW**

Overview and Organization  
Section I: Higher Education  
*Introduction*  
*Research on Doctoral Programs*  
*Synthesis: Research Implications*  
Section II: Adult Learning Theory  
*Introduction*  
*Self-Directed Learning*  
*Experiential Learning*  
*Informal Learning*  
*Synthesis: Research Implications*  
Chapter Summary and Discussion  
*Conceptual Framework*

### **CHAPTER III: METHODOLOGY**

Introduction  
Rationale for Research Approach  
*Rationale for Qualitative Research Design*  
*Rationale for Case Study Methodology*  
Sample and Population  
Information Needed  
Overview of Methodology  
*Pre-Data Collection: Literature Review*  
*Data Collection Phase I: Survey*  
*Data Collection Phase II: Interview*  
*Data Collection Phase III: Critical Incident*

Methods and Procedures for Data Analysis and Synthesis

*Overview*

*Analytic Approach*

*Synthesis*

Issues of Trustworthiness

*Credibility/Validity*

*Dependability/Reliability*

Ethical Considerations

Limitations of the Study

Chapter Summary

## **CHAPTER IV: PRESENTATION OF FINDINGS**

Introduction and Overview

Finding 1

Finding 2

Finding 3

Finding 4

Finding 5

Chapter Summary

## **CHAPTER V: ANALYSIS, INTERPRETATION, AND SYNTHESIS**

Introduction

Analytic Category 1

Analytic Category 2

Analytic Category 3

Synthesis

Reexamination of Assumptions From Chapter 1

Summary of Interpretation of Findings

## **CHAPTER VI: CONCLUSIONS AND RECOMMENDATIONS**

Introduction and Overview

*Conclusion 1*

*Conclusion 2*

*Conclusion 3*

*Conclusion 4*

Recommendations

*Recommendations for the Program Administrators*

*Recommendations for Faculty*

*Recommendations for Further Research*

A Final Reflection on the Study

**References**

**Appendices**

**List of Tables**

**List of Figures**
